# Supplementary material for: Pharmaceutical management of elderly high-risk patients in perioperative settings (PHAROS): protocol of a pilot sequential intervention study
Source: HighWire-hosted journal article supplement (doi:10.1136/bmjopen-2020-039094), 2020-11-01
Supplement: bmjopen-2020-039094supp001_data_supplement.pdf [file bmjopen-2020-039094supp001_data_supplement.pdf]

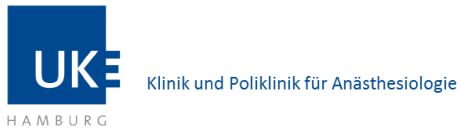

## Patienteninformation

### **PHAROS – Pharmazeutisches Management von älteren Risikopatienten im perioperativen Setting**

Prospektive Studie zur Optimierung der Dauermedikation und Vermeidung von Arzneimittelbezogenen Problemen bei Patienten über 65 Jahren

#### Prüfzentrum

Universitätsklinikum Hamburg-Eppendorf  
Martinistrasse 52  
20246 Hamburg

Sehr geehrte Damen und Herren,

die Einnahme von Medikamenten ist für die meisten Menschen alltägliche Routine. Medikamente helfen uns, gesund zu bleiben, Krankheiten vorzubeugen, sie zu heilen, zu verlangsamen oder mit ihnen zurecht zu kommen.

Medikamente haben jedoch auch Nebenwirkungen und beeinflussen sich gegenseitig in ihren Auswirkungen, häufig auf negative Weise. Diese Nebenwirkungen und gegenseitigen Beeinflussungen – sogenannte Interaktionen – treten umso mehr in den Vordergrund, je mehr Medikamente von einer Person eingenommen werden müssen. Die Anzahl der pro Person eingenommenen Präparate steigt statistisch mit zunehmenden Lebensalter an, bedingt durch die Zunahme an chronischen Erkrankungen. Die Einnahme von mehr als fünf Präparaten ist dann häufig eher Regel als Ausnahme – man spricht von sogenannter Multimedikation oder Polypharmazie. Liegt eine Multimedikation vor, ist besondere Vorsicht geboten, insbesondere wenn die Präparate von verschiedenen Fachärzten unabhängig voneinander verschrieben wurden (z.B. ein Schmerzmittel vom Orthopäden, ein Kreislaufmedikament vom Kardiologen, ein Beruhigungsmittel vom Hausarzt) und die gesamte Dauermedikation nicht regelmäßig ärztlich überprüft wird.

Wir möchten im Rahmen dieser Studie die Dauermedikation unserer Patienten näher analysieren. Dazu arbeiten wir mit unseren pharmazeutischen Kollegen aus der Krankenhausapotheke eng zusammen. Ein/e Apotheker/in wird dabei Ihre Medikation nach unserem ersten Kontakt mit Ihnen in der Prämedikationsambulanz beurteilen und ggf. Ihren Hausarzt kontaktieren, wenn eine Umstellung ratsam erscheint. Auch Sie werden wir über Ihre Medikation und notwendige Umstellungen ausführlicher aufklären, als es üblicherweise der Fall ist. Dabei werden wir besonders auf potentiell inadäquate Medikation achten, also Präparate, auf die im fortgeschrittenen Lebensalter verzichtet werden sollte. Sollte während

des Krankenhausaufenthaltes eine erneute Umstellung der Medikation erforderlich sein, so werden wir auch nach Ihrer Entlassung noch einmal mit Ihrem Hausarzt in Kontakt treten.

Im Rahmen dieser Studie werden wir Sie vor der Operation ausführlicher befragen, als es in der Regelversorgung der Fall ist und Sie bitten, mit uns gemeinsam einige Fragebögen auszufüllen. Wir werden dabei neben medizinischen Informationen auch Ihre kognitive Funktion erfassen (u.a. Gedächtnis, Konzentrationsspanne, Aufmerksamkeit) und Sie befragen, wie zufrieden Sie mit der medizinischen Versorgung sind. Wir werden des Weiteren dokumentieren, wie selbständig Sie im Alltag sind, wie Ihr soziales Umfeld funktioniert und wie Sie Ihre Lebensqualität einschätzen. Diese Daten werden wir heute, mehrere Wochen vor Ihrem geplanten Eingriff, sowie unmittelbar nach der Entlassung aus dem Krankenhaus von Ihnen erheben. Um zu beurteilen, wie sich eventuelle Umstellungen der Medikation auf das Leben unserer Patienten nach der Operation auswirken, werden wir Sie bitten, sich drei Monate nach Ihrer Entlassung erneut bei uns im UKE vorzustellen.

Um die in dieser Studie durchgeführten Maßnahmen wissenschaftlich zu bewerten, ist ein Vorher-Nachher-Vergleich notwendig. In der Kontrollphase werden wir von Ihnen zwar alle o.g. Daten erheben, jedoch zunächst noch keine Änderungen Ihrer Dauermedikation vornehmen. Im Rahmen unseres Treffens drei Monate nach der Operation bieten wir Ihnen dann jedoch gerne die Möglichkeit der pharmazeutischen Medikationsanalyse an. Sofern eine Umstellung der Medikation sinnvoll erscheint, würden wir zu diesem Zeitpunkt Ihren Hausarzt mit einer entsprechenden Empfehlung kontaktieren.

**Die geplante Operation und sich anschließende Behandlungen werden durch Ihre Teilnahme an der Studie nicht beeinflusst oder verändert. Es ist gewährleistet, dass Ihnen durch die Teilnahme an der Studie zu keinem Zeitpunkt Nachteile entstehen, d.h. die Durchführung notwendiger medizinischer Maßnahmen wird dadurch nicht verzögert oder verhindert. Die Studie begleitet Sie vor und nach der Operation, ohne die Therapie zu beeinflussen. Im Zweifelsfall hat Ihre optimale medizinische Versorgung immer Vorrang vor der Gewinnung von wissenschaftlichen Daten.**

Alle Daten, die Sie betreffen und die Sie uns zur Verfügung stellen (Gespräche mit Ihnen, mit Ihren Haus- oder anderen Ärzten, Testergebnisse, Laborbefunde, Krankenhausbefunde) unterliegen der ärztlichen Schweigepflicht. Zur wissenschaftlichen Verwendung werden diese Informationen nach datenschutzrechtlichen Bestimmungen mit fortlaufenden Nummern versehen und getrennt von Ihren personenbezogenen Daten an zentraler Stelle gespeichert, so dass eine Zuordnung zu Ihrer Person nicht ohne Schlüssel möglich ist (Pseudonymisierung). Der Schlüssel zur Zuordnung der Daten verbleibt bei der Studienleitung unter Verschluss und wird nach Abschluss der Studie vernichtet, womit eine Zuordnung der Daten zu Ihrer Person unmöglich wird (Anonymisierung).

**Ihre Teilnahme an der Studie ist freiwillig. Sie können jederzeit, auch ohne Angaben von Gründen, Ihre Teilnahmebereitschaft widerrufen, ohne dass Ihnen dadurch irgendwelche Nachteile entstehen.**

Datenschutz: Sie müssen mit der Aufzeichnung der im Rahmen der Behandlung an Ihnen erhobenen Krankheitsdaten, ihrer anonymisierten Verwendung, z. B. für wissenschaftliche Veröffentlichungen einverstanden sein. Hierzu beachten Sie bitte die gesonderte Aufklärung auf den folgenden Seiten.

## Informationen zum Datenschutz

### PHAROS – Pharmazeutisches Management von älteren Risikopatienten im perioperativen Setting

Name des/ der Patient/ in: \_\_\_\_\_

Anschrift: \_\_\_\_\_

Aufklärende/r Ärztin/ Arzt (Name, Tel.-Nr.): \_\_\_\_\_

### Umgang mit persönlichen Daten/ Datenschutz

Bei klinischen Prüfungen werden persönliche Daten und medizinische Befunde erhoben. Die Erhebung, Weitergabe, Speicherung und Auswertung dieser Angaben über die Gesundheit erfolgt nach den gesetzlichen Bestimmungen.

Die im Rahmen der Studie nach Ihrer Einwilligungserklärung erhobenen persönlichen Daten, insbesondere Befunde, unterliegen der Schweigepflicht und den datenschutzrechtlichen Bestimmungen. Sie werden in Papierform und auf Datenträgern in der Klinik für Anästhesiologie des UKE aufgezeichnet und pseudonymisiert (verschlüsselt)<sup>1</sup> für die Dauer von 10 Jahren gespeichert. Bei der Pseudonymisierung<sup>1</sup> (Verschlüsselung) werden der Name und andere Identifikationsmerkmale (z.B. Teile des Geburtsdatums) durch z. B.: mehrstellige Buchstaben- oder Zahlenkombinationen, auch Code genannt, ersetzt, um die Identifizierung des Studienteilnehmers auszuschließen oder wesentlich zu erschweren.

Zugang zu dem „Schlüssel“, der eine persönliche Zuordnung der Daten ermöglicht, der eine persönliche Zuordnung der Daten ermöglicht, hat nur die Studienleitung. Die Codierungsliste verbleibt unter Verschluss in der Klinik für Anästhesiologie des UKE.

Die Auswertung und Nutzung der Daten durch die Studienleiter und Studien-Mitarbeiter erfolgt in pseudonymisierter<sup>1</sup> Form. Die Veröffentlichung und Präsentation der Studienergebnisse erfolgt nur in anonymisierter<sup>2</sup> Form.

Die Studienteilnehmer haben das Recht, über die von ihnen erhobenen personenbezogenen Daten Auskunft zu verlangen und über möglicherweise anfallende personenbezogene Ergebnisse der Studie ggf. informiert oder nicht informiert zu werden. Unrichtig verarbeitete Daten, die sie betreffen, werden auf ihren Wunsch hin korrigiert.

Diese Studie ist durch die zuständige Ethik-Kommission beraten worden. Der zuständigen Landesbehörde kann ggf. Einsichtnahme in die Studienunterlagen in pseudonymisierter Form gewährt werden.

Sobald der Forschungszweck es zulässt, wird der Schlüssel gelöscht und die erhobenen Daten damit anonymisiert<sup>2</sup>.

Im Falle des Widerrufs der Einwilligungserklärung werden die bereits erhobenen Daten ebenfalls gelöscht oder anonymisiert<sup>2</sup> und in dieser Form weiter genutzt. Ein Widerruf bereits anonymisierter<sup>2</sup> Daten ist nicht möglich.

<sup>1</sup>Pseudonymisieren ist das Ersetzen des Namens und anderer Identifikationsmerkmale durch ein Kennzeichen zu dem Zweck, die Identifizierung des Betroffenen auszuschließen oder wesentlich zu erschweren (§3 Abs. 6a Bundesdatenschutzgesetz).

<sup>2</sup>Anonymisieren ist das Verändern personenbezogener Daten derart, dass die Einzelangaben über persönliche oder sachliche Verhältnisse nicht mehr oder nur mit einem unverhältnismäßig großen Aufwand an Zeit, Kosten und Arbeitskraft einer bestimmten oder bestimmaren natürlichen Person zugeordnet werden können (§3 Abs. 6 Bundesdatenschutzgesetz).

## Studienteilnehmer/in - Einwilligungserklärung

### PHAROS – Pharmazeutisches Management von älteren Risikopatienten im perioperativen Setting

Name des/ der Patient/ in: \_\_\_\_\_

Anschrift: \_\_\_\_\_

Aufklärende/r Ärztin/ Arzt (Name, Tel.-Nr.): \_\_\_\_\_

Ich bin von meiner/m behandelnden Ärztin/ Arzt über **den Zweck der Studie** aufgeklärt worden. **Ich bin damit einverstanden, dass meine Krankheitsdaten pseudonymisiert (d.h. unter Angabe einer Patienten-Identifikationsnummer) gesammelt werden.** Ich wurde darauf hingewiesen, dass ich meine Einwilligung jederzeit ohne Angabe von Gründen ohne nachteilige Folgen für meine weitere medizinische und ärztliche Versorgung widerrufen kann.

Ich erkläre mich damit einverstanden, an der vorgenannten Studie teilzunehmen. Eine Kopie der Patient/inneninformation und Einwilligungserklärung sowie der Erklärung zum Datenschutz habe ich erhalten. Die mir erteilten Informationen habe ich verstanden.

ja

nein

\_\_\_\_\_  
Ort, Datum, Unterschrift des/r Patienten/in

\_\_\_\_\_  
Ort, Datum, Unterschrift der/s aufklärenden Ärztin/Arztes

#### Weitere Informationen

Sollten Sie weitere Fragen bezüglich der Studie haben, wenden Sie sich bitte an die Leitung der klinischen Prüfung: Dr. med. Cynthia Olotu und Prof. Dr. med. Rainer Kiefmann ([c.olotu@uke.de](mailto:c.olotu@uke.de); [r.kiefmann@uke.de](mailto:r.kiefmann@uke.de))
